# Supplementary material for: Effects of indium exposure on respiratory symptoms: a retrospective cohort study in Japanese workers using health checkup data
Source: PeerJ. 2020 Jan 15;8:e8413. doi: 10.7717/peerj.8413 (PMC6969551; doi:10.7717/peerj.8413)
Supplement: Supplemental Information 2 [file peerj-08-8413-s002.xlsx]

## Sheet: variables
file	variable name	Description	type	value	label
data1.dta	company_id	This number is arbitrarily assigned for each company.	continuous
data1.dta	pID	This number is arbitrarily assigned for each worker.	continuous
data1.dta	mesID	Observation order by each worker.	continuous
data1.dta	mesN	Total number of observations by each worker.	continuous
data1.dta	date_of_hc	Health checkup date.	date
data1.dta	merge1	Types of health checkup conducted in this observation.	categorical	1	general health checkup only
				2	indium medical examination only
				3	both
data1.dta	sex	Sex	categorical	1	male
				2	female
data1.dta	age	Age	continuous
data1.dta	symptom1	Answer to the question "Does your voice wither? or do you have a foreign body sensation in your throat?"	categorical	0	no
				1	yes
data1.dta	symptom2	Answer to the question "Has your coughing continued or is there any sputum production?"	categorical	0	no
				1	yes
data1.dta	symptom3	Answer to the question "Do you have strong palpitations or breathlessness?"	categorical	0	no
				1	yes
data1.dta	symptom4	Answer to the question "Do you fall asleep easily but wake too early in the morning and are unable to fall back to sleep?"	categorical	0	no
				1	yes
data1.dta	symptom5	Answer to the question "Do you have insomnia?"	categorical	0	no
				1	yes
data1.dta	smk	Smoking status	categorical	1	never smoker
				2	current smoker
				3	former smoker
data1.dta	dust_cur	Current work experience in a dusty environment	categorical	0	no
				1	yes
data1.dta	dust_past	Past work experience in a dusty environment	categorical	0	no
				1	yes
data1.dta	his_sick1	Past medical history. Please refer to the "disease_code" sheet for the disease name.	string
data1.dta	his_sick2		string
data1.dta	his_sick3		string
data1.dta	his_sick4		string
data1.dta	his_sick5		string
data1.dta	his_sick6		string
data1.dta	trt_sick1	Current treatment. Please refer to the "disease_code" sheet for the disease name.	string
data1.dta	trt_sick2		string
data1.dta	trt_sick3		string
data1.dta	trt_sick4		string
data1.dta	trt_sick5		string
data2.dta	protect	Answer to the question "Do you use protective equipment?"	categorical	0	always use
				1	sometime use
				2	not use
data2.dta	mass_exp	Answer to the question "Did you have a massive exposure?"	categorical	0	no
				1	yes
				2	unknown
data2.dta	sin	Serum indium (μg/L)	continuous
data2.dta	kl6	KL-6 (U/ml)	continuous
data2.dta	chestXp1	Findings in chest X-ray	string
data2.dta	chestXp2	Findings in chest X-ray	string

## Sheet: disease_code
Code	disease name
0001	No disease
0100	Infectious diseases / parasitic diseases
0101	Intestinal infection
010101	Cholera
010102	Salmonella infection
010103	Dysentery
010104	Other bacterial food poisoning
010105	Viral intestinal infection
0102	Tuberculosis
010201	Pulmonary tuberculosis
010202	Tuberculous pleurisy
010203	Spine caries
0103	Sexually transmitted disease
010301	Syphilis
010302	Neisseria gonorrhoeae infection
010303	Chlamydia infection
010304	Trichomoniasis
0104	Skin lesion virus disease
010401	Herpes simplex
010402	Minamata
010403	Herpes zoster
010404	Measles
010405	Rubella
010406	Sudden rash
010407	Infectious erythema
010408	Hand-foot-and-mouth disease
0105	Viral hepatitis
010501	Hepatitis A
010502	Hepatitis B
010503	Hepatitis C
010504	Serum hepatitis
010505	Fulminant hepatitis
010506	Hepatitis B virus carrier
010507	Hepatitis C virus carrier
0106	Other viral diseases
010601	Acute leukomyelitis (Polio)
010602	Japanese encephalitis
010603	AIDS (HIV)
010604	Mumps
010605	Infectious mononucleosis
0107	Mycosis
010701	Ringworm (athlete's foot)
010702	Candidiasis
010703	Aspergillosis
0108	Secondary and sequelae of infectious and parasitic diseases
010801	Tuberculosis sequelae
010802	Old pulmonary tuberculosis, old pleurisy
0109	Other infectious and parasitic diseases
010901	Weil's disease
010902	Leprosy
010903	Atypical mycobacterial infection
010904	Tetanus
010905	Diphtheria
010906	Scarlet fever
010907	Sepsis
010908	Trachoma
010909	Tsutsugamushi disease
010910	Malaria
010911	Toxoplasmosis
010912	Fluke
010913	Tapeworm
010914	Helminthiasis
010915	Roundworm
010916	Wormworm disease
010917	Anisakiasis
010918	Kaisen
0200	Neoplasm
0201	Stomach cancer
020101	Suspected stomach cancer
0202	Colorectal cancer
020201	Suspected colorectal cancer
0203	Rectal cancer
020301	Suspected rectal cancer
0204	Liver cancer
020401	Suspected liver cancer
0205	Lung cancer
020501	Suspected lung tumor
020502	Ground glass-like shadow (GG0, GGA)
020503	Atypical adenomatous hyperplasia (AAH)
020509	Suspected lung cancer
0206	Breast cancer
020601	Suspected breast cancer
0207	Uterine cancer
020701	Suspected uterine cancer
0208	Malignant lymphoma
020801	Multiple myeloma
0209	Leukemia
020901	Lymphocytic leukemia
020902	Myeloid leukemia
0210	Other malignant neoplasms
021001	Tongue cancer
021002	Esophageal cancer
021003	Gallbladder cancer
021004	Bile duct cancer
021005	Pancreatic cancer
021006	Laryngeal cancer
021007	Skin cancer (malignant melanoma, etc.)
021008	Mesothelioma (pleural mesothelioma)
021009	Ovarian cancer
021010	Choriocarcinoma
021011	Prostate cancer
021012	Kidney cancer
021013	Bladder cancer
021014	Thyroid cancer
021015	Gastric adenoma
021016	Leiomyosarcoma
021017	Carcinoid
021018	Mediastinal tumor
021020	Suspected malignant neoplasm
021021	Suspected of prostate cancer
0211	Benign neoplasm
021101	Brain tumor
021104	Lipoma
021105	Hepatic hemangioma
021106	Mastopathy
021107	Breast fibroadenoma
021108	Uterine fibroid
021109	Ovarian cyst
021110	True erythrocytosis (true polycythemia)
021111	Myelodysplastic syndrome
021112	Adenoma (colon, thyroid, etc.)
021113	Suspected benign neoplasm
0212	Post-biological findings
0300	Blood / hematopoietic diseases, immune system disorders
0301	Anemia
030101	Iron deficiency anemia
030102	Vitamin B deficiency anemia (malignant anemia)
030103	Hemolytic anemia
030104	Aplastic anemia
0302	Other blood and hematopoietic diseases, immune system disorders
030201	Blood coagulation disorder
030202	Disseminated intravascular coagulation syndrome (DIC)
030203	Hemophilia
030204	Purpura
030205	Idiopathic thrombocytopenic purpura
030206	Allergic purpura
030207	Granulocytopenia
030208	Leukocytosis
030209	Spleen disease
030210	Secondary erythrocytosis
030211	Polycythemia (stress)
030212	Sarcoidosis
0400	Endocrine / nutrition / metabolic disorders
0401	Thyroid disease
040101	Simple goiter
040102	Hyperthyroidism (including Graves' disease)
040103	Subacute thyroiditis
040104	Hypothyroidism (Myxedema)
040105	Autoimmune thyroiditis (Hashimoto disease)
0402	Diabetes mellitus
040201	Type I diabetes (IDDM)
040202	Type II diabetes (NIDDM)
040203	Diabetic nephropathy
040204	Diabetic retinopathy
040205	Diabetic neurosis
040206	Blood glucose level doctor management
0403	Other endocrine, nutritional and metabolic disorders
040301	Hypoglycemia
040302	Hyperinsulinism (insulinoma)
040303	Hypoparathyroidism
040304	Acromegaly (pituitary giantism)
040305	Hyperprolactinemia
040306	Hypopituitarism (Sheehan syndrome)
040307	Cushing syndrome
040308	Aldosteronism
040309	Pheochromocytoma
040310	Vitamin deficiency
040311	Obesity
040312	Lactose intolerance
040313	Renal diabetes
040314	Hyperlipidemia
040315	Constitutional jaundice
040316	Amyloidosis
040317	Hyperuricemia
040318	Low HDL-CHOemia
040319	Metabolic syndrome
040320	Dyslipidemia
0500	Mental and behavioral disorders
0501	Vascular dementia
050101	Multiple infarct dementia
050102	Presenile dementia
0502	Mental and behavioral disorders due to psychoactive substances
050201	Alcoholism
050202	Chronic alcoholism
0503	Schizophrenia
0504	Mood [emotion] disorder
050401	Manic depression
050402	Depression
050403	Mild depression
0505	Neurotic disorders / stress-related disorders
050501	Neurosis
050502	Phobia
050503	Anxiety
050504	Panic disorder
050505	Obsessive-compulsive disorder
050506	Psychosomatic disorder
050507	Cheirospasm
0506	Mental retardation
0507	Other mental and behavioral disorders
050701	Eating disorders (nervous anorexia)
050702	Autism
050703	Disability of personality, behavior, customs, impulses
0600	Nervous system diseases
0601	Parkinson's disease
0602	Alzheimer's disease
0603	Epilepsy
0604	Cerebral palsy (child paralysis)
0605	Autonomic ataxia
0606	Other nervous system diseases
060601	Bacterial meningitis
060602	Encephalitis
060603	Amyotrophic lateral sclerosis
060604	Spastic torticollis
060605	Dystony
060606	Essential tremor
060607	Multiple sclerosis
060608	Migraine
060609	Cluster headache
060610	Tension headache
060611	Sleep apnea syndrome
060612	Trigeminal neuralgia
060613	Facial paralysis
060614	Thoracic outlet syndrome
060615	Elbow canal syndrome
060616	Carpal tunnel syndrome
060617	Guillain-Barre syndrome
060618	Intercostal neuralgia
060619	Myasthenia gravis
060620	Muscular dystrophy
060621	Periodic limb paralysis
060622	Meningitis
0700	Eye disease
0701	Conjunctivitis
0702	Cataract
0703	Refraction / adjustment disorder
070301	Hyperopia
070302	Myopia
070303	Astigmatism
070304	Disillusion
070305	Presbyopia
0704	Other eye diseases
070401	Stye
070402	Mitosis
070403	Blepharitis
070404	Tears of tears
070405	Dry eye syndrome
070406	Pterygium
070407	Keratitis
070408	Irisitis
070409	Recurrent choroiditis (Harada disease)
070410	Retinal detachment / retinal hiatus
070411	Retinal vascular occlusion
070412	Retinitis pigmentosa
070413	Senile macular degeneration
070414	Glaucoma
070415	Optic neuritis
070416	Eye strain
070417	Color blindness
070418	Blind
070419	Central retinopathy
070420	Retinitis pigmentosa
0800	Ear disease
0801	Otitis externa
0802	Other external ear diseases
0803	Otitis media
080301	Exudative otitis media
080302	Purulent otitis media
0804	Other diseases of the middle ear and mastoid process
080401	Eustachitis / Eustachian obstruction
080402	Middle ear cholesteatoma
080403	Tympanic membrane perforation
0805	Meniere's disease
0806	Other inner ear diseases
080601	Otitis media
080602	Otosclerosis
080603	Vestibular neuritis
080604	Acoustic trauma
080605	Noise-induced hearing loss
0807	Other ear diseases
080701	Sensorineural hearing loss
080702	Congenital hearing loss
080703	Drug-induced hearing loss
080704	Presbycusis
080705	Sudden deafness
0900	Cardiovascular disease
0901	High blood pressure
090101	Essential hypertension
090102	Nephrosclerosis (hypertensive nephropathy)
090103	Hypertensive heart disease
090104	Renovascular hypertension
090105	Renal hypertension
090106	Blood pressure doctor management
0902	Ischemic heart disease
090201	Angina
090202	Acute myocardial infarction
090203	Old myocardial infarction
090204	Coronary insufficiency
090205	Myocardial infarction
0903	Other heart diseases
090301	Rheumatic heart disease
090302	Rheumatic valvular disease
090303	Primary pulmonary hypertension
090304	Pulmonary heart
090305	Mitral regurgitation
090306	Mitral valve prolapse
090307	Mitral stenosis
090308	Aortic stenosis
090309	Aortic regurgitation
090310	Cardiomyopathy (expansion, hypertrophy, restraint)
090311	Cardiac hypertrophy
090312	Arrhythmia
090313	Extra systole
090314	Paroxysmal tachycardia
090315	WPW syndrome
090316	Atrial fibrillation
090317	Atrial flutter
090318	Atrioventricular block
090319	Sick sinus syndrome
090320	Heart failure
090321	Congestive heart failure
090322	Pacemaker installed
0904	Subarachnoid hemorrhage
0905	Intracerebral hemorrhage
090501	Sequelae of intracerebral hemorrhage
0906	Cerebral infarction
090601	Cerebral thrombus
090602	Secondary and sequelae of cerebral infarction
0907	Cerebral arteriosclerosis
0908	Other cerebrovascular diseases
090801	Cerebral aneurysm
090802	Chronic subdural hematoma
090803	Stroke
090804	Hypertensive encephalopathy
090805	Transient cerebral ischemic attack
0909	Atherosclerosis (symptom)
0910	Hemorrhoids (inner and outer hemorrhoids)
0911	Hypotension
0912	Other cardiovascular diseases
091201	Rheumatic fever
091202	Pulmonary embolism
091203	Aortic aneurysm and aortic dissection
091204	Raynaud's syndrome
091205	Buerger disease
091206	Arterial embolism / thrombosis
091207	Thrombophlebitis
091208	Varicose veins in the lower limb
091209	Esophageal varices
0913	Postoperative findings of cardiovascular disease
1000	Respiratory disease
1001	Acute nasopharyngitis (cold)
1002	Acute pharyngitis / tonsillitis
100201	Acute tonsillitis (angina)
1003	Other acute upper respiratory tract infections
100301	Acute laryngitis
100302	Acute obstructive laryngitis (croup)
1004	Pneumonia
100401	Influenza
100402	Viral pneumonia
100403	Bacterial pneumonia
100404	Mycoplasma pneumonia
1005	Acute bronchitis / panbronchiolitis
1006	Allergic rhinitis
100601	Hay fever
1007	Chronic sinusitis (pyremic syndrome)
1008	Bronchitis
1009	Chronic obstructive pulmonary disease
100901	Chronic bronchitis
100902	Emphysema
1010	Asthma
101001	Bronchial asthma
101002	Childhood asthma
1011	Other respiratory diseases
101101	Chronic rhinitis
101102	Nasal polyp
101103	Nasal septum fold disease
101104	Chronic tonsillitis (hypertons enlargement)
101105	Adenoid hypertrophy
101106	Vocal cord polyp
101107	Bronchiectasis
101108	Pneumoconiosis (silicosis, asbestosis)
101109	Pleural thickening plaque (plaque)
101110	Idiopathic pulmonary fibrosis
101111	Pulmonary edema
101112	Lung abscess and empyema
101113	Exudative pleurisy
101114	Swallowing pneumonia
101115	Natural pneumothorax
101171	Organic pneumonia
101172	Lung mass
101173	Lung cyst
101174	Eosinophilic pneumonia
101175	Granuloma
101176	Bronchiolitis obliterans organizing pneumonia
101177	Funnel chest
101178	Middle lobe syndrome
101179	Lung tumor
101180	Metastatic lung tumor
101181	Interstitial pneumonia
1100	Digestive system diseases
1101	Tooth decay
1102	Gingivitis and periodontitis
1103	Tooth and support tissue disorders
110301	Pulpitis
110302	Temporomandibular disorders (endomandibular disorder)
1104	Gastric / duodenal ulcer
110401	Stomach ulcer
110402	Stomach erosion
110403	Duodenal ulcer
110404	Stomach ulcer scar
110405	Duodenal ulcer scar
1105	Gastritis / duodenal inflammation
110501	Gastritis
110502	Duodenal inflammation
110503	Acute gastritis
110504	Chronic gastritis (atrophic / hypertrophic gastritis)
1106	Alcoholic liver disease
110601	Alcoholic fatty liver
110602	Alcoholic hepatitis
110603	Alcoholic cirrhosis
1107	Chronic hepatitis
110701	Chronic hepatitis (due to hepatitis B virus)
110702	Chronic hepatitis (due to hepatitis C virus)
110703	Hepatitis
110706	Liver function doctor management
1108	Cirrhosis
110801	Cirrhosis (due to hepatitis B virus)
110803	Primary biliary cirrhosis
1109	Other liver diseases
110901	Liver abscess
110902	Fatty liver
110903	Liver failure
110904	Acute hepatitis
1110	Gallbladder disease
111001	Cholelithiasis
111002	Cholecystitis
1111	Pancreatitis
1112	Other digestive disorders
111201	Salivary gland atrophy
111202	Aphthous stomatitis
111203	Glossitis
111204	Reflux esophagitis
111205	Achalasia
111206	Esophageal ulcer (including Barrett ulcer)
111207	Mallory-Weiss syndrome
111208	Gastric diverticulum
111209	Stomach droop
111210	Gastroenteritis
111211	Irritable bowel syndrome
111212	Damping syndrome
111213	Acute appendicitis
111214	Stomach polyp
111215	Crohn's disease (localized enteritis)
111216	Ulcerative colitis
111217	Colitis
111218	Bowel obstruction
111219	Colorectal polyp
111220	Colonic diverticulum
111221	Diaphragmatic hernia
111222	Inguinal hernia
111223	Peritonitis
111224	Anal fissure, fistula, anal abscess
111225	Gallbladder polyp
111226	Gastrointestinal polyp
111227	Salivary disease
1200	Skin and subcutaneous tissue diseases
1201	Skin and subcutaneous tissue infections
120101	Furuncle
120102	Carbuncle
120103	Acute lymphadenitis
120104	Peritonitis / nailitis
1202	Dermatitis / eczema
120201	Atopic dermatitis
120202	Contact dermatitis
120203	Flat lichen
120204	Urticaria
1203	Other skin / subcutaneous tissue diseases
120301	Herpes zoster (palmulosa pustulosis)
120302	Psoriasis vulgaris
120303	Hives
120304	Nodular erythema
120305	Alopecia areata
120306	Acne
120307	Hair follicle flame
120308	Vitiligo
120309	Chloasma
120310	Clavus
120311	Dry skin
1300	Musculoskeletal diseases
1301	Inflammatory polyarthropathy
130101	Rheumatoid arthritis
130102	Gout
1302	Osteoarthritis
130201	Heberden nodule
130202	Osteoarthritis of the hip
130203	Knee arthritis
130204	Knee osteoarthritis
1303	Spinal disorder
130301	Cervical spondylosis
130302	Spinal canal stenosis
1304	Intervertebral disc disorder
130401	Cervical disc herniation
130402	Lumbar sacral hernia
1305	Cervical arm syndrome
1306	Low back pain and sciatica
130601	Low back pain
130602	Sciatica
1307	Other spinal disorders
130701	Scoliosis
130702	Spondylolysis
130703	Spondylolisthesis
130704	Spondyloarthropathy
130705	Torticollis
130706	Brachial neuritis
1308	Shoulder periarthritis (50 shoulders)
1309	Osteoporosis
130901	Adult osteomalacia
1310	Musculoskeletal and connective tissue diseases
131001	Hallux valgus
131002	Kawasaki disease
131003	Aortitis syndrome (Takayasu disease)
131004	Systemic lupus erythematosus (SLE)
131005	Dermatomyositis
131006	Systemic sclerosis (scleroderma)
131007	Sjogren's syndrome
131008	Behcet's disease
131009	Tendonitis
131010	Spring finger
131011	Ganglion
131012	Tennis elbow
131013	Osteomyelitis
131014	Perthes disease
131015	Neuritis
131016	Neuralgia
131017	Achilles peritonitis
1400	Urinary system diseases
1401	Kidney disease
140101	Glomerulonephritis
140102	Recurrent and persistent hematuria
140103	Single proteinuria
140104	Nephrotic syndrome
140105	Pyelonephritis
140106	Urinary protein / occult blood doctor management
140111	Chronic kidney disease
1402	Kidney failure
140201	Uremia
140202	Uremia neuropathy
1403	Urinary stone
140301	Kidney stone
140302	Ureteral stone
1404	Other urinary tract diseases
140401	Atrophic kidney
140402	Renal cyst
140403	Migratory kidney
140404	Cystitis
140405	Neurogenic bladder
140406	Urethritis
1405	Benign prostatic hyperplasia
1406	Other male genital diseases
140601	Prostatitis
1407	Menstrual disorders and perimenopausal disorders
140701	Menstrual abnormalities
140702	Irregular uterine bleeding
140703	Dysmenorrhea
140704	Menopause
140705	Senile [atrophic] vaginitis
1408	Breast and other female genital diseases
140801	Mastitis
140802	Fallopian tubeitis / ovitis
140803	Vaginitis
140804	Cervicitis
140805	Endometriosis
140806	Infertility
140807	Uterine polyp
140811	Mammary duct ectasia
1500	Pregnancy / parturition and birth
150001	Pregnancy
1501	Abortion
150101	Ectopic pregnancy
1502	Pregnancy toxemia
1503	Single birth spontaneous delivery
1504	Other pregnancy and childbirth
150401	Imminent miscarriage
150402	Multiple pregnancy
150403	Caesarean section
1600	Diseases that occurred during the perinatal period
1601	Disorders related to pregnancy and fetal development
1602	Other perinatal conditions
1700	Congenital malformations / deformations / chromosomal abnormalities
1701	Congenital malformations of the heart
170101	Ventricular septal defect
170102	Atrial septal defect
170103	Tetralogy of Fallot
170104	Right chest
1702	Other congenital malformations and deformed chromosome abnormalities
170201	Patent ductus arteriosus
170202	Cleft lip
170203	Esophageal diverticulum
170204	Polycystic kidney
170205	Congenital hip dislocation
170206	Down syndrome
1800	Symptoms / Signs abnormalities Clinical findings Abnormal laboratory findings
1801	Systemic symptoms / signs
180101	Tachycardia
180102	Bradycardia
180103	Unknown fever
180104	Headache
180105	Fatigue
1802	Gastrointestinal symptoms / signs
180201	Stomach ache
1803	Symptoms / signs of skin and subcutaneous tissue
1804	Nervous and musculoskeletal symptoms / signs
180401	Involuntary movement
180402	Tremor
180403	Myalgia
1805	Urinary system symptoms / signs
1806	Symptoms and signs related to recognition, perception, emotion, and behavior
180601	Dizziness
180602	Olfactory disturbance
180603	Taste disorder
1807	Abnormal findings in various symptoms and tests
180701	Impaired glucose tolerance
180702	ECG abnormal findings
180703	Borderline hypertension
180704	Chronic B / C hepatitis carriers
180705	Chest X-ray abnormal findings
180706	Abnormal findings of X-ray in the stomach
180707	Abnormal cardiac categorization and echocardiographic findings
180708	Abnormal findings of lipid test
180709	Abnormal findings in liver function tests
180710	Abnormal blood test findings
180711	Fundus examination abnormal findings
180712	Abdominal ultrasound abnormal findings
180713	Abnormal findings of biopsy and cytology
180714	Increased PSA value
180771	Inflammatory changes
180772	Inflammation scar
180773	Diaphragm fist
180774	Pleural thickening
180775	Calcification
180776	Hardening nest
180777	Chest adhesions
180778	Hilar lymphadenopathy
180779	Diffuse shadow
180780	Nodule shadow
180781	Granular shadow
180782	Irregular shading
1808	Unclear diagnosis name
180801	Polyp
1900	Influence of external causes such as damage and poisoning
1901	Fracture
190101	Skull fracture
190102	Rib fracture
190103	Lumbar fracture
190104	Clavicle fracture
190105	Femur fracture
1902	Intracranial and internal organ damage
190201	Brain shake
190202	Traumatic pneumothorax
1903	Burns and corrosion
1904	Poisoning
190401	Drug poisoning
190402	Poisoning from biological agents
190403	Occupational poisoning
190404	Effects of toxic food
1905	Other damage and other external effects
190501	Superficial damage to various parts of the body
190502	Traumatic cutting
190503	Dislocation and sprain of joints and ligaments
190504	Heat stroke
190505	Diving disease
9900	Other diseases
990001	Tumor
990002	Cyst
990003	Leaf tumor
990004	Calcification
990005	Hamartoma
990006	Lymph node inflammation
990007	Postoperative findings
990008	Submucosal tumor
990009	Xanthoma
9995	Other
9996	Helicobacter pylori eradication
9997	Other mental disorders
9998	Other
